# Supplementary material for: Adult Goat Retinal Neuronal Culture: Applications in Modeling Hyperglycemia
Source: PubMed Central journal article supplement (PMC6756134; doi:10.3389/fnins.2019.00983), 2019-09-16
Supplement: Data_Sheet_1.pdf [file Data_Sheet_1.pdf]

**Table S1. Quantitative RT-PCR primers list**

| <b>Animal</b>  | <b>Gene name</b> | <b>Forward</b>        | <b>Reverse</b>        |
|----------------|------------------|-----------------------|-----------------------|
| <b>Goat</b>    | Caspr1           | AAGACCCACTTCCGAACGCC  | TGGCATGGCTCCGCAGTTAG  |
|                | Caspr2           | CGGCCTCTTTCCCAAACCCA  | GGCCCGTTCCCGACATCAAA  |
|                | Prion            | GAAGCGACCAAAACCTGGCG  | TGAGGTGGATAGCGGTTGCC  |
|                | Contactin        | CTTGGAGCCGTGGTTCAGACA | AATCCACTGCTCTTGCTGCCT |
|                | C/EBP $\alpha$   | CTGCCCGAACAGAACAGCGT  | ATCGGAGCGGTGAGTTTGCG  |
|                | C/EBP $\beta$    | GCCCGCCCGTGGTGTATTTA  | TGTACACACGCGTTCAGCCA  |
|                | GAPDH            | CCGTAACTTCTGTGCTGTGCC | CGTTCACTCCGACCTTCACCA |
|                | $\beta$ -Actin   | CTGGACTTCGAGCAGGAGATG | GTTTCGTGAATGCCGCAGGA  |
|                | <b>Mouse</b>     | Caspr1                | CGTTGGTCAGCTCCGCATGA  |
| Caspr2         |                  | CAAAGCAGGAGGAGCTTGGCT | CGGGCCAGTGGTACTCCAAA  |
| Prion          |                  | GGCCTTGGTGGCTACATGCT  | TAGCGGTCCTCCCAGTCGTT  |
| Contactin      |                  | AGATGGTCCCCAATTCAGCGG | TGTCACACGCAGTCGGGTCTA |
| $\beta$ -Actin |                  | ACTCTGTGTGGATCGGTGGC  | CAGCTCAGTAACAGTCCGCCT |
