# Supplementary material for: Adult Goat Retinal Neuronal Culture: Applications in Modeling Hyperglycemia
Source: PubMed Central journal article supplement (PMC6756134; doi:10.3389/fnins.2019.00983), 2019-09-16
Supplement: Data_Sheet_2.pdf [file Data_Sheet_2.pdf]

| Culture Media              | Day 2     | Day 4      | Day 6       | Day 8       | Day 10      |
|----------------------------|-----------|------------|-------------|-------------|-------------|
| 5 mM Glucose DMEM          | 0.9 ± 1.7 | 1.9 ± 1.7  | 13.3 ± 6.6  | 19.9 ± 16.1 | 72.2 ± 45.9 |
| 25 mM Glucose DMEM         | 1.4 ± 1.8 | 9.5 ± 9.8  | 16.9 ± 17.0 | 141 ± 89    | 134 ± 117   |
| 25 mM Glucose Neurobasal A | 3.6 ± 2.7 | 10.2 ± 2.8 | 103 ± 125   | 147 ± 118   | 68.7 ± 74.2 |

**Table S2.** Cell counts per field (results expressed as mean ± SD) for each group. 6-10 random fields were examined under 10X magnification. Retinal neurons were cultured in 5 mM glucose DMEM, 25 mM glucose DMEM, or 25 mM glucose Neurobasal A medium for up to 10 days.
