# Supplementary material for: Adult Goat Retinal Neuronal Culture: Applications in Modeling Hyperglycemia
Source: PubMed Central journal article supplement (PMC6756134; doi:10.3389/fnins.2019.00983), 2019-09-16
Supplement: Data_Sheet_3.pdf [file Data_Sheet_3.pdf]

| Gene       | Sequence recognized | Transcription Factor | Start | Stop |
|------------|---------------------|----------------------|-------|------|
| Contactin1 | <b>ACTAATAATT</b>   | C/EBP $\alpha$       | -550  | -541 |
| Contactin1 | <b>TTATGCAGGT</b>   | C/EBP $\beta$        | -85   | -76  |
| Caspr1     | <b>AGGCGGGGGA</b>   | C/EBP $\alpha$       | -387  | -378 |
| Prion      | <b>AGCTATTCAG</b>   | C/EBP $\alpha$       | -559  | -550 |
| Caspr2     | <b>CACGCGGGCG</b>   | C/EBP $\alpha$       | -48   | -39  |

**Table S3.** Binding sites for the transcription factors C/EBP  $\alpha$  and C/EBP  $\beta$  upstream of goat CAM promoters, predicted using Alibaba2 software, Version 2.1, Germany.
